# Supplementary material for: Polycyclic polyprenylated acylphloroglucinols fromGarcinia xanthochymusfruits exhibit antitumor effects through inhibition of the STAT3 signaling pathway
Source: Royal Society of Chemistry journal article supplement (doi:10.1039/d0fo02535f), 2020-01-01
Supplement: d0fo02535f1.pdf [file d0fo02535f1.pdf]

### Electronic Supplementary Information

This ESI (published 16<sup>th</sup> June 2023) is an update which replaces the original ESI associated with the manuscript, published 17<sup>th</sup> October 2020

## **Polycyclic polyprenylated acylphloroglucinols from *Garcinia xanthochymus* fruits exhibit antitumor effects through inhibition of the STAT3 signaling pathway**

Jing Xu,<sup>‡a</sup> Shan Jin,<sup>‡a</sup> Fei Gan,<sup>b</sup> Hui Xiong,<sup>a</sup> Zhinan Mei,<sup>a</sup> Yu Chen<sup>\*b</sup> and Guangzhong Yang <sup>\*a,c</sup>

a School of Pharmaceutical Sciences, South-Central University for Nationalities, Wuhan 430074, P. R. China. E-mail: yanggz888@126.com; Fax: +8627 6784 1196; Tel: +86 27 6784 1196 b College of Chemistry and Material Sciences, South-Central University for Nationalities, Wuhan 430074, P. R. China. E-mail: chenyuwh888@126.com c National Demonstration Center for Experimental Ethnopharmacology Education, South-Central University for Nationalities, Wuhan 430074, P. R. China

<sup>†</sup>Electronic supplementary information (ESI) available. See DOI: 10.1039/d0fo02535f

<sup>‡</sup>These authors contributed equally to this work.

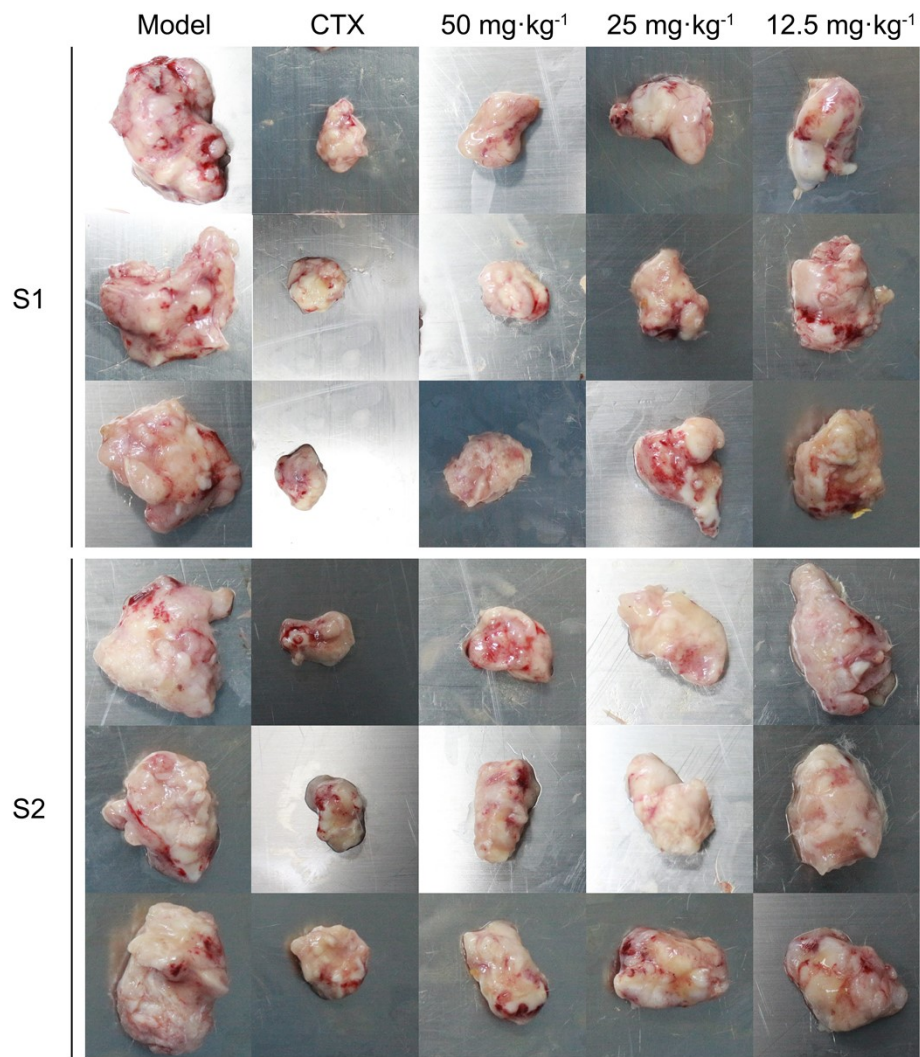

Figure S1. The final pictures of tumor tissues in different groups

# 中国典型培养物保藏中心

CHINA CENTER FOR TYPE CULTURE COLLECTION (CCTCC)

Wuhan University, Wuhan 430072, China

Phone: 86-027-68752093

Fax: 86-027-68754833

Email: shenchao@whu.edu.cn

02-13-2023

Entrusted by South-Central University for Nationalities, CCTCC has conducted identification experiments on the MCF-7, and come to the following conclusions:

1. There was no third allele found in MCF-7, it indicating that there was no cross-contaminant of human source cell.
2. Compared the STR data of MCF-7 in the databases of ATCC, DSMZ and CELLOSAURUS, its profile does not exactly match with any of the current data (Table 1).
3. The STR data of MCF-7 and HeLa (CCL-2) cell matches the rate of 98.55% in CELLOSAURUS database.

Manager:

China Center for Type Culture Collection

Note:

1. The result is only responsible for the test sample, and the genomic DNA will be reserved for three months.
2. Reference of human cell authentication: ANSI/ATCC ASN-0002-2011

Figure S2. Conclusions of analysis of MCF-7 cell line

| MCF-7 (Fig. No. SJ-01037) |          |          |
|---------------------------|----------|----------|
| Marker                    | Allele 1 | Allele 2 |
| D19S433                   | 13       | 14       |
| D5S818                    | 11       | 12       |
| D21S11                    | 27       | 28       |
| D18S51                    | 16       | 16       |
| D6S1043                   | 18       | 19       |
| AMEL                      | X        | X        |
| D3S1358                   | 15       | 18       |
| D13S317                   | 12       | 13.3     |
| D7S820                    | 8        | 12       |
| D16S539                   | 9        | 10       |
| CSF1PO                    | 9        | 10       |
| Penta D                   | 8        | 15       |
| D2S441                    | 10       | 11       |
| vWA                       | 16       | 18       |
| D8S1179                   | 12       | 13       |
| TPOX                      | 8        | 12       |
| Penta E                   | 7        | 17       |
| TH01                      | 7        | 7        |
| D12S391                   | 20       | 25       |
| D2S1338                   | 17       | 17       |
| FGA                       | 21       | 21       |

Figure S3. Alleles of 21 loci in MFC-7 cell line

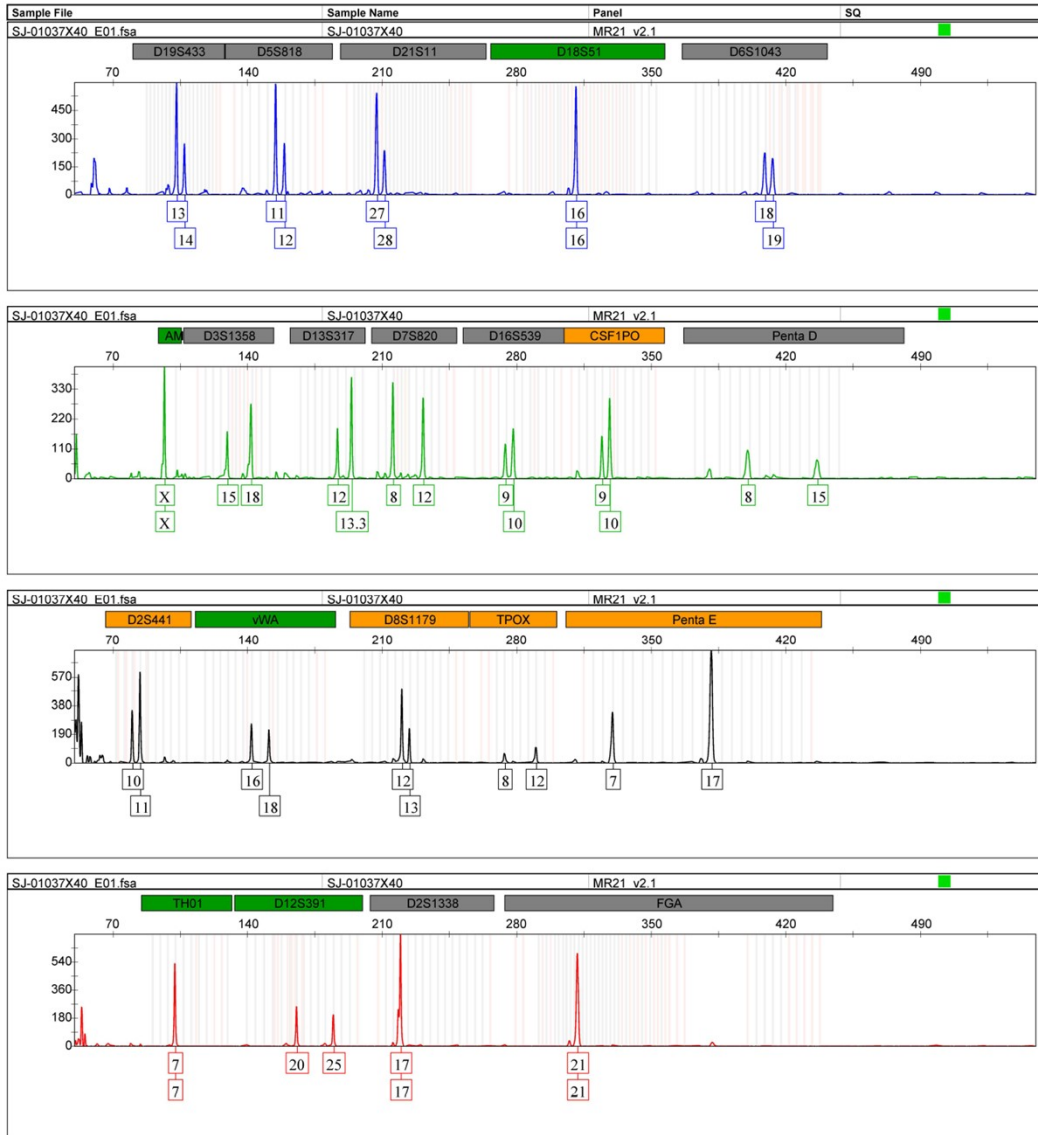

Figure S4. Genemapper output
